# Supplementary material for: Nanocrystalline β-NiS: a redox-mediated electrode in aqueous electrolyte for pseudocapacitor/supercapacitor applications
Source: Royal Society of Chemistry journal article supplement (doi:10.1039/d2cp03847a), 2022-11-14
Supplement: d2cp03847a1.pdf [file d2cp03847a1.pdf]

## **Nanocrystalline $\beta$ -NiS; A Redox-mediated Electrode in Aqueous Electrolyte for Pseudo-capacitor/Supercapacitor Applications**

Vishal Kushwaha<sup>1</sup>, Asha Gupta<sup>1\*</sup>, Ram Bilash Choudhary<sup>2</sup>, K. D. Mandal<sup>1</sup>, Rakesh Mondal<sup>3</sup> and Preetam Singh<sup>3\*</sup>

1. Department of Chemistry, Indian Institute of Technology (Banaras Hindu University) Varanasi, Uttar Pradesh, 221005, India
2. Department of Physics, Indian Institute of Technology (Indian School of Mines), Dhanbad 826004, India
3. Department of Ceramic Engineering, Indian Institute of Technology (Banaras Hindu University) Varanasi, Uttar Pradesh, 221005, India

**\*: corresponding Author**

**Email:** [asha.chy@itbhu.ac.in](mailto:asha.chy@itbhu.ac.in), [toashagupta@gmail.com](mailto:toashagupta@gmail.com)

**Phone:** 91-6390363140

**Email:** [preetamsingh.cer@itbhu.ac.in](mailto:preetamsingh.cer@itbhu.ac.in), [preetamchem@gmail.com](mailto:preetamchem@gmail.com)

**Phone:** 91-9473720659

The electrochemical properties of the fabricated AC (activate carbon) electrode was studied using cyclic voltammetry and galvanostatic charge-discharge as shown in Fig. S<sub>1</sub> and S<sub>2</sub>.

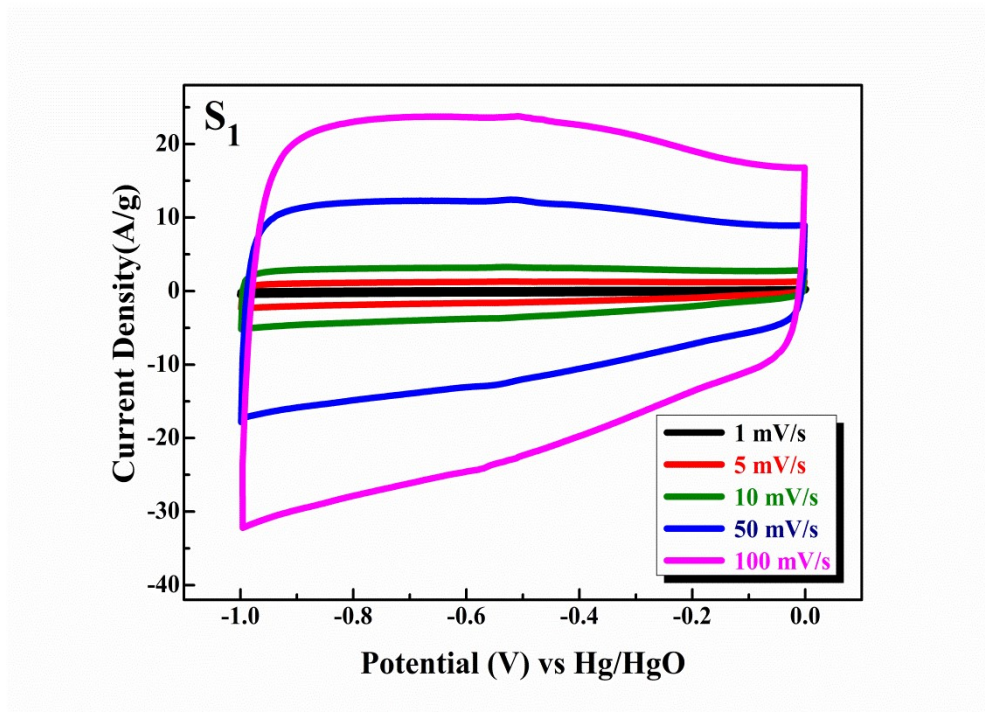

Fig. S<sub>1</sub>. CV curve of AC in 1M KOH electrolyte using SCE as the reference electrode.

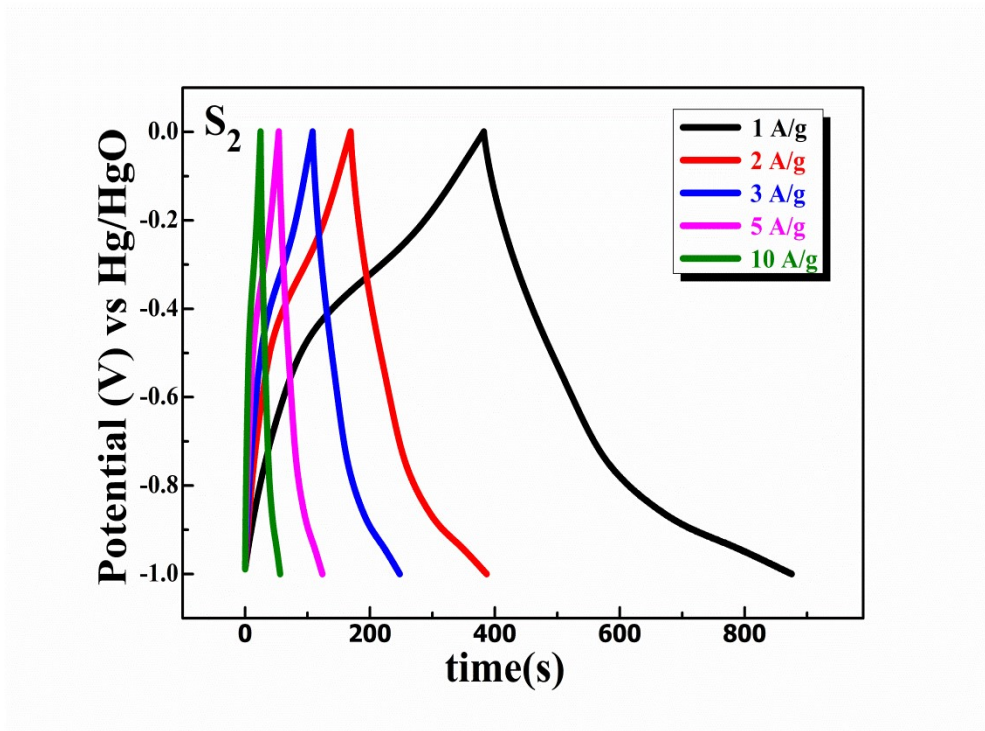

Fig. S<sub>2</sub>. GCD curve of AC electrode in 1M KOH electrolyte using SCE as the reference electrode.
